# Supplementary material for: An improved device with an affinity membrane to collect depth specific contamination free water for environmental assessment
Source: Royal Society of Chemistry journal article supplement (doi:10.1039/c7an01528c), 2017-12-22
Supplement: c7an01528c1.pdf [file c7an01528c1.pdf]

## **Supporting Information**

**An improved device with affinity membrane to collect depth specific contamination free water for environmental assessment**

**Sweta Binod Kumar, Hardik Trivedi, Narshibhai Rameshbhai Baraiya, Soumya Haldar\***

Division of Marine Biotechnology and Ecology, CSIR- Central Salt and Marine Chemicals Research Institute, GB Marg, Bhavnagar-364002, Gujarat, India

**\*Correspondence: S. Haldar (shaldar@csmcri.res.in), +91-278-2561354 (T), +91-278-2566970 (Fax)**

**Table S 1. Concentration of bacteria on different media from different seawater depth**

| S.<br>No. | Media               | GD1             |                    | GD2             |                   |
|-----------|---------------------|-----------------|--------------------|-----------------|-------------------|
|           |                     | Seawater        | PVDF<br>Membrane   | Seawater        | PVDF<br>Membrane  |
| 1.        | EMB Agar            | -               | $1.5 \times 10^3$  | -               | $5 \times 10^3$   |
| 2.        | XLD Agar            | $3 \times 10^1$ | $1.65 \times 10^3$ | -               | $4 \times 10^3$   |
| 3.        | TCBS Agar           | -               | $2 \times 10^3$    | $1 \times 10^1$ | $3.6 \times 10^3$ |
| 4.        | Jensen's Agar       | -               | $2 \times 10^4$    | -               | $1.5 \times 10^4$ |
| 5.        | MacConkey Agar      | -               | $7.5 \times 10^2$  | -               | $1.5 \times 10^2$ |
| 6.        | Aeromonas Agar      | -               | -                  | -               | -                 |
| 7.        | Streptococcus Agar  | -               | -                  | -               | -                 |
| 8.        | M-Enterococcus Agar | -               | -                  | -               | -                 |
| 9.        | Cetrimide Agar      | -               | -                  | -               | -                 |
| 10.       | ZM Agar             | -               | $3 \times 10^6$    | -               | $3.5 \times 10^6$ |

  

| S.<br>No. | Media                  | VD1             |                  | VD2             |                   | VD3               |                   |
|-----------|------------------------|-----------------|------------------|-----------------|-------------------|-------------------|-------------------|
|           |                        | Seawater        | PVDF<br>Membrane | Seawater        | PVDF<br>Membrane  | Seawater          | PVDF<br>Membrane  |
| 1.        | EMB Agar               | $3 \times 10^1$ | $4 \times 10^3$  | $4 \times 10^3$ | $3 \times 10^4$   | $3.5 \times 10^3$ | $2.5 \times 10^4$ |
| 2.        | XLD Agar               | -               | -                | -               | -                 | -                 | $1 \times 10^3$   |
| 3.        | TCBS Agar              | $1 \times 10^2$ | $5 \times 10^3$  | $5 \times 10^2$ | $8.7 \times 10^3$ | $6 \times 10^2$   | $4 \times 10^4$   |
| 4.        | Jensen's Agar          | $3 \times 10^3$ | $4 \times 10^3$  | $5 \times 10^1$ | $3 \times 10^4$   | $1 \times 10^1$   | $7 \times 10^2$   |
| 5.        | MacConkey<br>Agar      | -               | -                | -               | $6.8 \times 10^2$ | -                 | $7.5 \times 10^2$ |
| 6.        | Aeromonas<br>Agar      | -               | $4 \times 10^3$  | -               | $1 \times 10^1$   | $1 \times 10^1$   | $1.6 \times 10^2$ |
| 7.        | Streptococcus<br>Agar  | -               | -                | -               | -                 | -                 | -                 |
| 8.        | M-Enterococcus<br>Agar | -               | -                | -               | $1 \times 10^2$   | -                 | -                 |
| 9.        | Cetrimide Agar         | -               | $4 \times 10^3$  | -               | -                 | -                 | $2 \times 10^1$   |
| 10.       | ZMA                    | -               | -                | -               | -                 | -                 | -                 |

**Table S 2. Images of different media plates showing bacterial colony growth from seawater of different depth and bacteria recovered from PVDF membrane from the same seawater depth**

| S. No. | Media     | GD 1                                                                                | GD 2                                                                                 |
|--------|-----------|-------------------------------------------------------------------------------------|--------------------------------------------------------------------------------------|
| 1.     | EMB Agar  | Seawater                                                                            | -                                                                                    |
|        |           | PVDF Membrane dipped in same seawater                                               |                                                                                      |
|        |           | 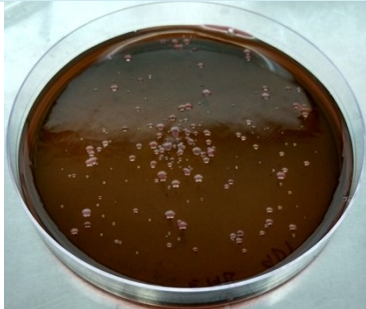   |    |
| 2.     | XLD Agar  | Seawater                                                                            | -                                                                                    |
|        |           | PVDF Membrane dipped in same seawater                                               |                                                                                      |
|        |           |   |  |
| 3.     | TCBS Agar | Seawater                                                                            | -                                                                                    |
|        |           | PVDF Membrane dipped in same seawater                                               |                                                                                      |
|        |           |  |  |

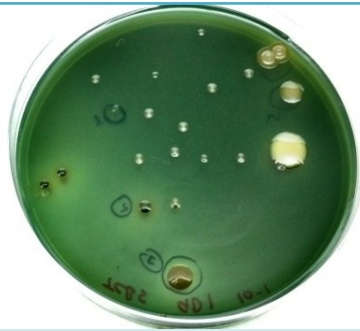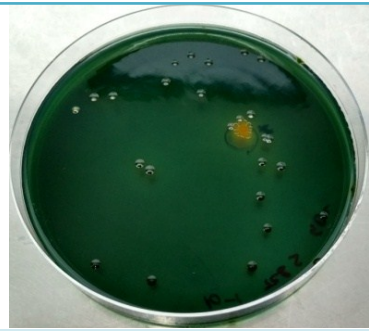

4. Jensen's  
Agar

Seawater

-

-

PVDF Membrane dipped in same seawater

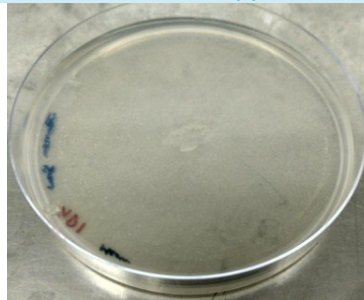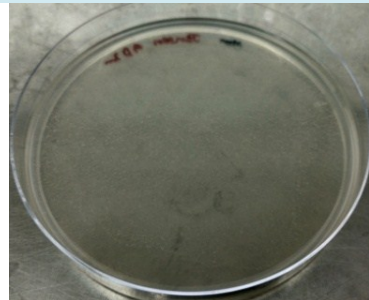

5. MacConkey  
Agar

Seawater

-

-

PVDF Membrane dipped in same seawater

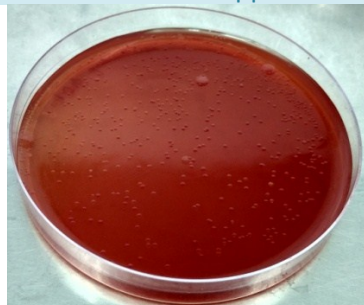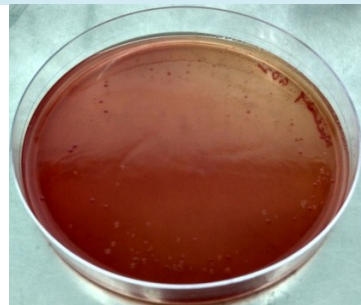

10. ZM Agar

Seawater

PVDF Membrane dipped in same seawater

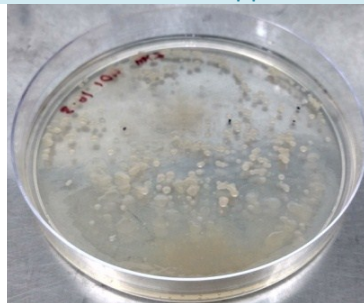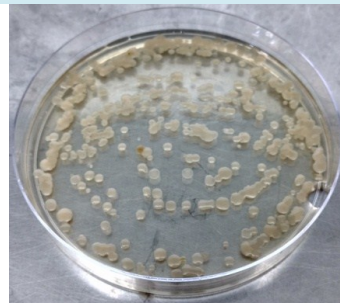



| S. No. | Media         | VD1                                                                                 | VD2                                                                                  | VD3                                                                                   |
|--------|---------------|-------------------------------------------------------------------------------------|--------------------------------------------------------------------------------------|---------------------------------------------------------------------------------------|
| 1.     | EMB Agar      | Seawater                                                                            |                                                                                      |                                                                                       |
|        |               | 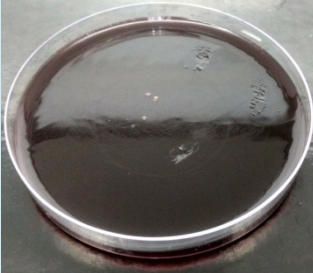   |    |    |
|        |               | PVDF Membrane dipped in same seawater                                               |                                                                                      |                                                                                       |
|        |               |    |    |    |
| 2.     | XLD Agar      | Seawater                                                                            |                                                                                      |                                                                                       |
|        |               | -                                                                                   | -                                                                                    | -                                                                                     |
|        |               | PVDF Membrane dipped in same seawater                                               |                                                                                      |                                                                                       |
|        |               | -                                                                                   | -                                                                                    |  |
| 3.     | TCBS Agar     | Seawater                                                                            |                                                                                      |                                                                                       |
|        |               |  |  |  |
|        |               | PVDF Membrane dipped in same seawater                                               |                                                                                      |                                                                                       |
|        |               |  |  |  |
| 4.     | Jensen's Agar | Seawater                                                                            |                                                                                      |                                                                                       |

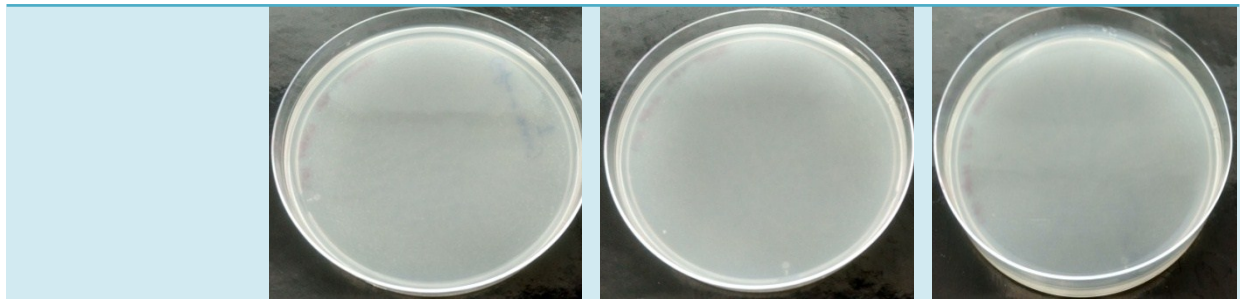

PVDF Membrane dipped in same seawater

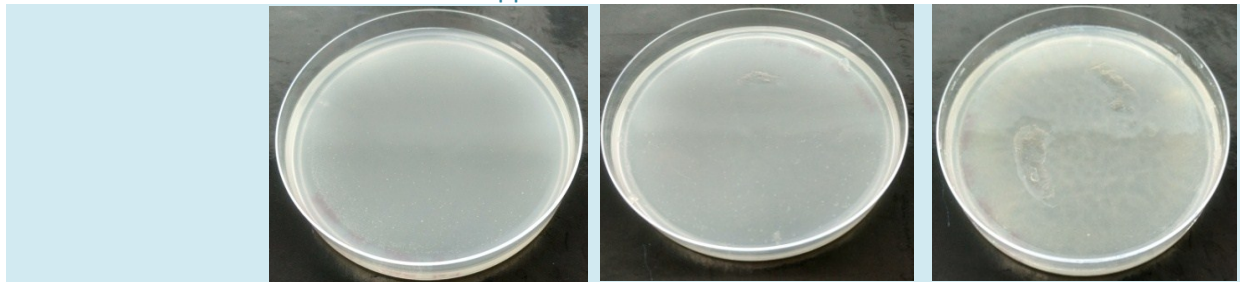

5. **MacConkey Agar** Seawater

- - -

PVDF Membrane dipped in same seawater

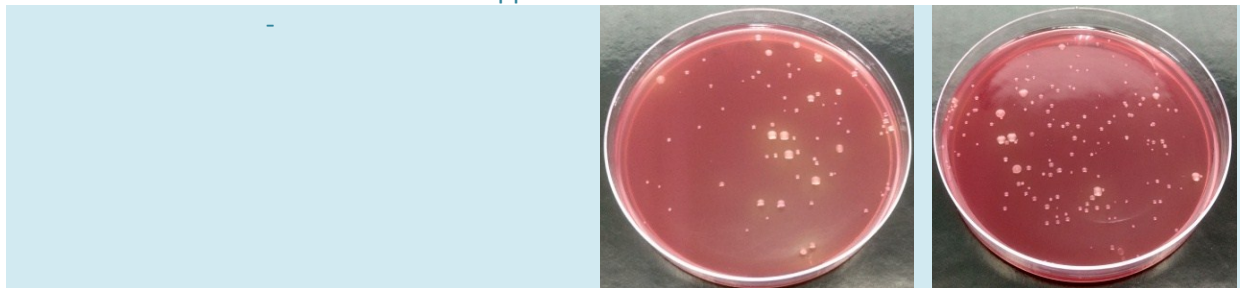

6. **Aeromonas Agar** Seawater

- -

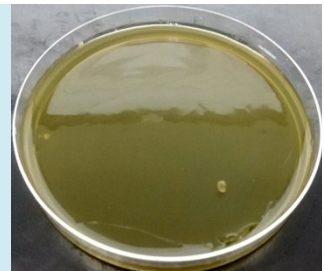

PVDF Membrane dipped in same seawater

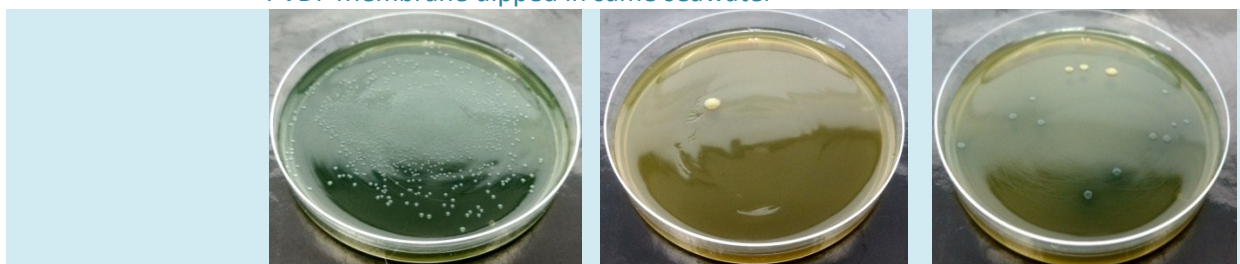

7. **M-Enterococcus Agar** Seawater

- - -

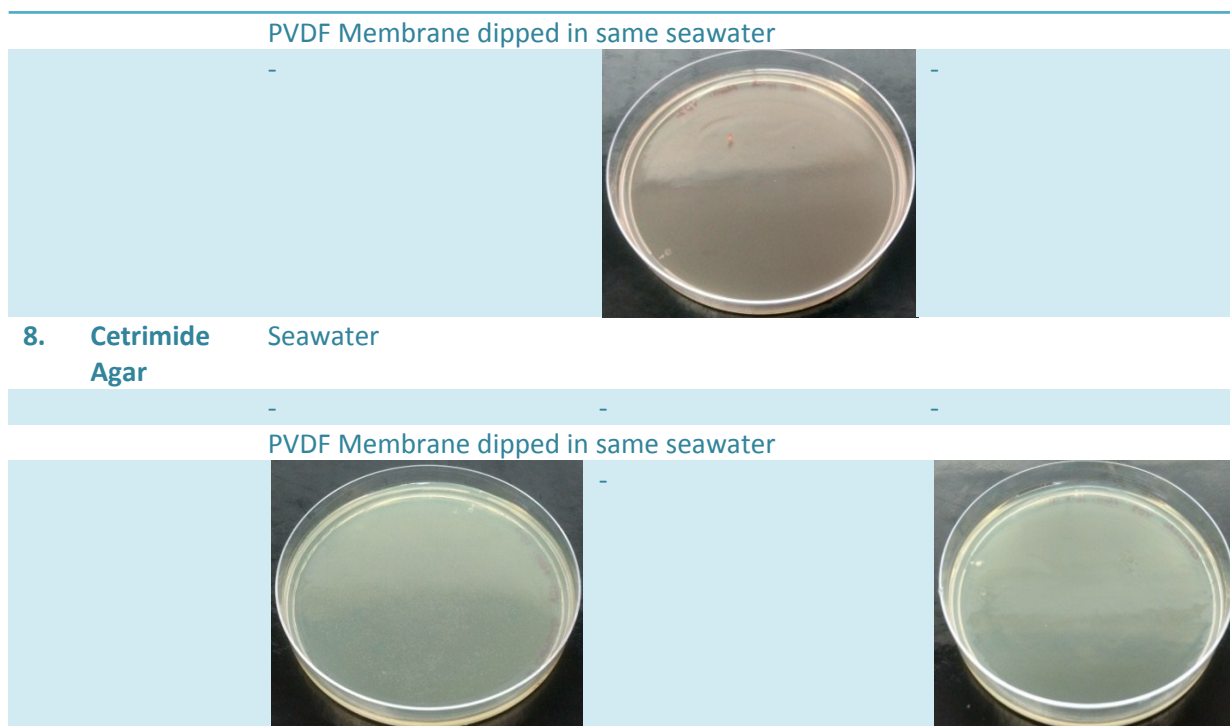

**Table S 3. Colony characteristics of the isolated bacteria from different culturable media**

| Strain No.        | TCBS Agar isolates            |           |                 |          |           |          |
|-------------------|-------------------------------|-----------|-----------------|----------|-----------|----------|
|                   | Morphological characteristics |           |                 |          |           |          |
|                   | Size                          | Shape     | Color           | Texture  | Elevation | Margin   |
| GTC1 (GD1)        | Medium                        | Round     | Green           | Smooth   | Umbonate  | Entire   |
| GTC2 (GD1)        | Medium                        | Round     | Dark Green      | Smooth   | Raised    | Entire   |
| GTC3 (GD1)        | Large                         | Round     | Greenish Yellow | Smooth   | Raised    | Entire   |
| GTC4 (GD1)        | Large                         | Round     | Brown           | Rough    | Umbonate  | Entire   |
| GTC5 (GD1)        | Large                         | Round     | Brown           | Smooth   | Raised    | Entire   |
| GTC6 (GD1)        | Large                         | Round     | Brownish Yellow | Smooth   | Raised    | Entire   |
| GTC7 (GD2)        | Medium                        | Rhizoid   | Yellow          | Wrinkled | Flat      | Undulate |
| XLD Agar isolates |                               |           |                 |          |           |          |
|                   | Morphological characteristics |           |                 |          |           |          |
| GXL1 (GD1)        | Medium                        | Round     | Pink            | Smooth   | Raised    | Entire   |
| GXL2 (GD1)        | Medium                        | Round     | Yellow          | Smooth   | Raised    | Entire   |
| GXL3 (GD2)        | Medium                        | Irregular | Pink            | Rough    | Flat      | Serrated |
| GXL4 (GD2)        | Medium                        | Wrinkled  | Pink            | Rough    | Flat      | Undulate |

| EMB Agar isolates             |            |       |             |         |           |        |
|-------------------------------|------------|-------|-------------|---------|-----------|--------|
| Morphological characteristics |            |       |             |         |           |        |
| GEM1 (GD1)                    | Medium     | Round | Brown       | Smooth  | Umbonate  | Entire |
| GEM2 (GD1)                    | Small      | Round | Cream       | Smooth  | Raised    | Entire |
| GEM3 (GD1)                    | Medium     | Round | Dark Brown  | Smooth  | Raised    | Entire |
| GEM4 (GD2)                    | Small      | Round | Cream       | Rough   | Flat      | Entire |
| GEM5 (GD2)                    | Small      | Round | Cream       | Smooth  | Raised    | Entire |
| GEM6 (GD2)                    | Medium     | Round | Cream       | Smooth  | Raised    | Entire |
| Jensen's Agar isolates        |            |       |             |         |           |        |
| Morphological characteristics |            |       |             |         |           |        |
| GJ1 (GD1)                     | Punctiform | Round | White       | Smooth  | Raised    | Entire |
| GJ2 (GD1)                     | Small      | Round | White       | Smooth  | Raised    | Entire |
| MacConkey Agar isolates       |            |       |             |         |           |        |
| Morphological characteristics |            |       |             |         |           |        |
| GMAC1 (GD1)                   | Small      | Round | Red         | Smooth  | Raised    | Entire |
| GMAC2 (GD1)                   | Small      | Round | White       | Smooth  | Raised    | Entire |
| GMAC3 (GD1)                   | Medium     | Round | Red         | Rough   | Flat      | Entire |
| ZM Agar isolates              |            |       |             |         |           |        |
| Morphological characteristics |            |       |             |         |           |        |
| GZM1 (GD1)                    | Small      | Round | White       | Smooth  | Raised    | Entire |
| GZM2 (GD1)                    | Medium     | Round | White       | Smooth  | Raised    | Entire |
| GZM3 (GD1)                    | Medium     | Round | Cream       | Smooth  | Raised    | Entire |
| GZM4 (GD1)                    | Film       |       |             |         |           |        |
| GZM5 (GD2)                    | Large      | Round | White       | Smooth  | Flat      | Entire |
| GZM6 (GD2)                    | Large      | Round | Pale Orange | Smooth  | Raised    | Entire |
| GZM7 (GD2)                    | Medium     | Round | Yellow      | Smooth  | Raised    | Entire |
| GZM8 (GD2)                    | Medium     | Round | Orange      | Smooth  | Raised    | Entire |
| TCBS Agar isolates            |            |       |             |         |           |        |
| Morphological characteristics |            |       |             |         |           |        |
| Strain No.                    | Size       | Shape | Color       | Texture | Elevation | Margin |



|                                      |            |           |            |        |             |          |
|--------------------------------------|------------|-----------|------------|--------|-------------|----------|
| VTC1<br>(VD3)                        | Big        | Round     | Yellow     | Rough  | Flat        | Entire   |
| VTC2<br>(VD3)                        | Big        | Round     | Green      | Smooth | Flat        | Entire   |
| VTC3<br>(VD3)                        | Medium     | Irregular | White      | Rough  | Raised      | Undulate |
| VTC4<br>(VD3)                        | Small      | Round     | Green      | Smooth | Raised      | Entire   |
| VTC5<br>(VD3)                        | Medium     | Round     | Dark Green | Smooth | Raised      | Entire   |
| VTC6<br>(VD2)                        | Large      | Round     | Yellow     | Smooth | Raised      | Entire   |
| VTC7<br>(VD2)                        | Medium     | Irregular | Yellow     | Rough  | Flat        | Undulate |
| VTC8<br>(VD1)                        | Small      | Irregular | Dark Green | Rough  | Raised      | Undulate |
| <b>XLD Agar isolates</b>             |            |           |            |        |             |          |
| <b>Morphological characteristics</b> |            |           |            |        |             |          |
| VXL1<br>(VD3)                        | Big        | Round     | Yellow     | Smooth | Raised      | Entire   |
| VXL2<br>(VD3)                        | Medium     | Round     | Cream      | Smooth | Raised      | Entire   |
| VXL3<br>(VD3)                        | Small      | Round     | Yellow     | Rough  | Flat        | Entire   |
| <b>EMB Agar isolates</b>             |            |           |            |        |             |          |
| <b>Morphological characteristics</b> |            |           |            |        |             |          |
| VEM1<br>(VD1)                        | Small      | Round     | Maroon     | Smooth | Raised      | Entire   |
| VEM2<br>(VD1)                        | Medium     | Irregular | Pink       | Rough  | Flat        | Lobate   |
| VEM3<br>(VD1)                        | Small      | Round     | Pink       | Smooth | Raised      | Entire   |
| VEM4<br>(VD1)                        | Punctiform | Round     | Pink       | Smooth | Raised      | Entire   |
| VEM5<br>(VD1)                        | Medium     | Irregular | Pink       | Rough  | Flat        | Undulate |
| VEM6<br>(VD2)                        | Medium     | Round     | Pink       | Smooth | Crateriform | Entire   |
| VEM7<br>(VD2)                        | Medium     | Round     | Maroon     | Smooth | Flat        | Entire   |
| VEM8<br>(VD2)                        | Small      | Round     | Chocolate  | Smooth | Flat        | Entire   |
| VEM9<br>(VD2)                        | Small      | Round     | Pink       | Smooth | Flat        | Entire   |
| VEM10<br>(VD3)                       | Medium     | Round     | Pink       | Smooth | Raised      | Entire   |
| VEM11<br>(VD3)                       | Medium     | Irregular | Pink       | Rough  | Flat        | Undulate |
| VEM12<br>(VD3)                       | Small      | spindle   | Pink       | Rough  | Flat        | Entire   |

|                                      |            |           |                               |        |        |        |
|--------------------------------------|------------|-----------|-------------------------------|--------|--------|--------|
| VEM13<br>(VD3)                       | Medium     | Round     | Pink                          | Smooth | Raised | Entire |
| <b>Jensen's Agar isolates</b>        |            |           |                               |        |        |        |
| <b>Morphological characteristics</b> |            |           |                               |        |        |        |
| VJ1<br>(VD1)                         | Small      | Round     | White                         | Smooth | Raised | Entire |
| VJ2<br>(VD1)                         | Very small | Round     | White                         | Smooth | Raised | Entire |
| VJ3<br>(VD1)                         | Punctiform | Round     | White                         | Smooth | Raised | Entire |
| VJ4<br>(VD2)                         | Small      | Irregular | White                         | Rough  | Raised | Curled |
| VJ5<br>(VD2)                         | Small      | Round     | White                         | Rough  | Flat   | Entire |
| <b>MacConkey Agar isolates</b>       |            |           |                               |        |        |        |
| <b>Morphological characteristics</b> |            |           |                               |        |        |        |
| VMAC1<br>(VD2)                       | Small      | Round     | Pink                          | Smooth | Raised | Entire |
| VMAC2<br>(VD2)                       | Big        | Round     | Cream                         | Smooth | Raised | Entire |
| VMAC3<br>(VD2)                       | Big        | Round     | Light pink                    | Rough  | Flat   | Entire |
| VMAC4<br>(VD2)                       | Medium     | Round     | Red                           | Smooth | Flat   | Entire |
| <b>M-Enterococcus Agar isolates</b>  |            |           |                               |        |        |        |
| <b>Morphological characteristics</b> |            |           |                               |        |        |        |
| VME1<br>(VD2)                        | Punctiform | Round     | Colourless                    | Smooth | Raised | Entire |
| VME2<br>(VD2)                        | Small      | Round     | Maroon                        | Smooth | Raised | Entire |
| <b>Aeromonas Agar isolates</b>       |            |           |                               |        |        |        |
| <b>Morphological characteristics</b> |            |           |                               |        |        |        |
| VA1<br>(VD1)                         | Medium     | Round     | Green                         | Smooth | Raised | Entire |
| VA2<br>(VD2)                         | Big        | Round     | Cream                         | Smooth | Raised | Entire |
| VA3<br>(VD3)                         | Medium     | Round     | Green                         | Smooth | Flat   | Entire |
| VA4<br>(VD3)                         | Big        | Round     | Brown                         | Smooth | Raised | Entire |
| VA5<br>(VD3)                         | Big        | Round     | Cream<br>with Green<br>center | Smooth | Raised | Entire |
| <b>Cetrimide Agar isolates</b>       |            |           |                               |        |        |        |
| <b>Morphological characteristics</b> |            |           |                               |        |        |        |
| VCET1<br>(VD1)                       | Punctiform | Round     | White                         | Smooth | Raised | Entire |
| VCET2<br>(VD3)                       | Small      | Round     | White                         | Smooth | Raised | Entire |

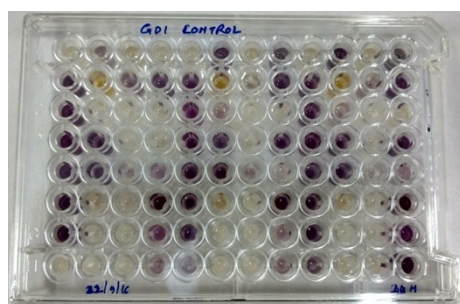

(A)

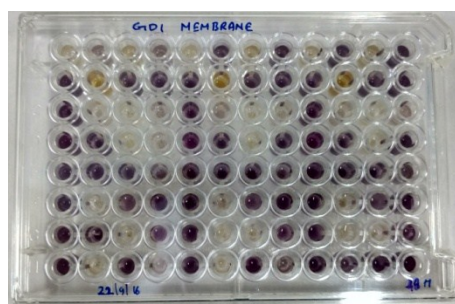

(F)

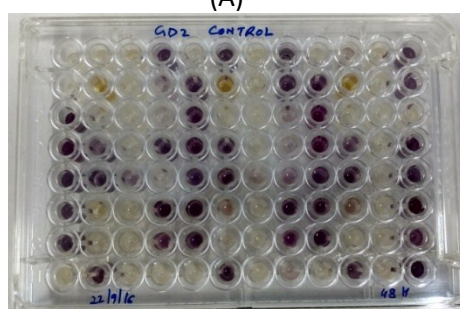

(B)

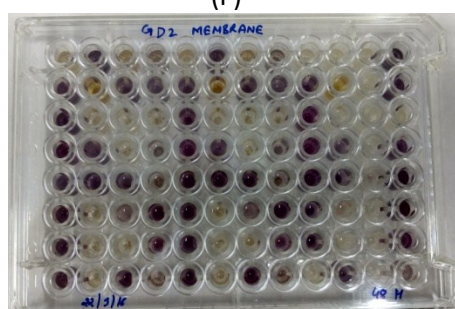

(G)

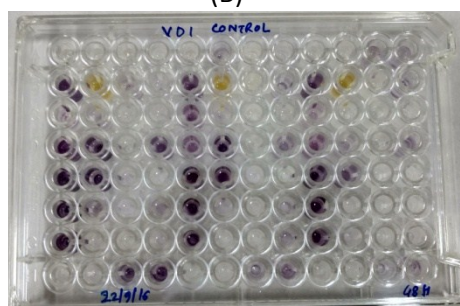

(C)

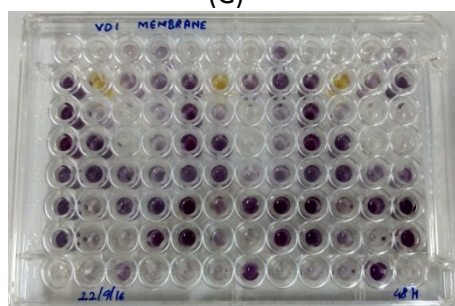

(H)

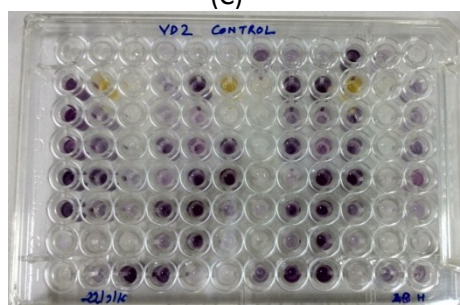

(D)

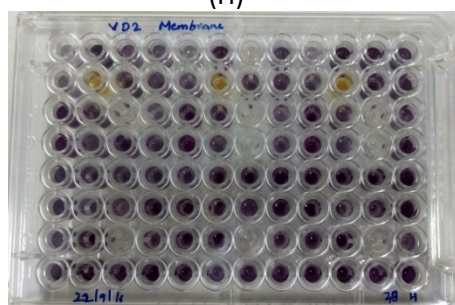

(I)

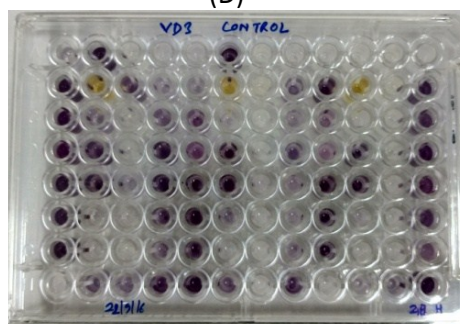

(E)

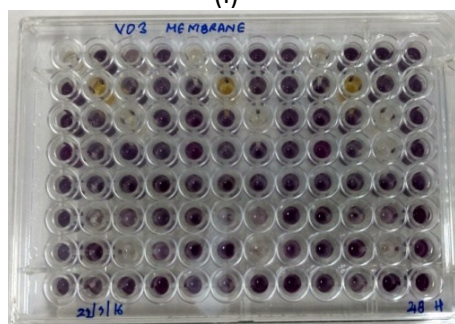

(J)

**Figure S 1.** Digital image of Biolog EcoPlates: (A-E) Direct seawater sample of GD 1, GD 2, VD 1, VD 2 and VD 3 respectively after 48 h of incubation (F-J) Bacteria recovered from membrane dipped in the same seawater samples of GD 1, GD 2, VD 1, VD 2 and VD 3 respectively after 48 h of incubation.
